# Supplementary material
Source: HighWire-hosted journal article supplement (https://gh.bmj.com/content/8/5/e011137)

## Appendix S1 – Reflexivity Statement

### 1. How does this study address local research and policy priorities?

Malaria is a leading cause of illness and death in Uganda. The country has made considerable efforts to control malaria burden through repeated distributions of insecticide treated nets and indoor residual spraying campaigns. Nevertheless, the burden of malaria remains high and progress to reduce its impact has slowed. Therefore, Uganda is a setting that would benefit substantially from high resolution, timely maps of malaria burden. These maps indicate areas that could be targeted for future interventions. They also allow for retrospective evaluation of the impact of interventions. The conclusions from this analysis indicate that these maps can continue to be generated with little financial investment from the National Malaria Control Programme. Furthermore, this study is of interest to other high burden malaria endemic countries that seek to improve the targeting of their control interventions.

### 2. How were local researchers involved in study design?

Local researchers were involved extensively in data collection, the design of the study, and interpretation/dissemination of findings. JFN led collection of the health facility data. EVK and IN managed the data and helped with cleaning, mapping, and data analysis. MRK helped to secure funding for the analysis, provided oversight of the data collection procedures, and helped with interpretation of findings.

### 3. How has funding been used to support the local research team?

Local researchers are supported through the International Centers of Excellence in Malaria Research (ICMER) program (U19AI089674). This funding stream also supports all research activities under the Uganda Malaria Surveillance Programme.

### 4. How are research staff who conducted data collection acknowledged?

Staff extensively involved in data collection and management (JFN, EVK, IN) are included as authors on the manuscript. Staff with less involvement in the day-to-day operations of the research are acknowledged at the end of the manuscript.

### 5. Do all members of the research partnership have access to study data?

All members of the partnership have access to all study data.

### 6. How was data used to develop analytical skills within the partnership?

AE, the lead author on the paper, led workshops on geo-spatial data analysis for partners.

### 7. How have research partners collaborated in interpreting study data?

Partners were kept abreast of research findings periodically throughout the analysis stages through presentations in regular meetings. During these meetings, partners provided feedback and insights into interpretation of results. These insights were incorporated into the manuscript.

**8. How were research partners supported to develop writing skills?**

Although there was no specific plan in place to refine writing skills for the purpose of this analysis, partners made extensive edits at each iteration of the manuscript.

**9. How will research products be shared to address local needs?**

The Infectious Diseases Research Collaboration (IDRC), the Ugandan partner included in this work, holds annual dissemination meetings where research findings are presented to the Ministry of Health and other key stakeholders such as the President's Malaria Initiative/CDC. Regular, less formal meetings are also held regularly between IDRC and the Ugandan National Malaria Control Programme. The findings from this work will be presented at these meetings.

**10. How is the leadership, contribution and ownership of this work by LMIC researchers recognised within the authorship?**

Four co-authors, including the second author, are LMIC researchers. These researchers participated extensively in the data collection, management, cleaning, analysis, and interpretation. Other LMIC researchers less involved in the day-to-day of this project are acknowledged at the end of the manuscript.

**11. How have early career researchers across the partnership been included within the authorship team?**

Several early career researchers are included (AE, JFN, IN, EVK) and took leadership roles on data collection and analysis. The lead author on this paper was a PhD student at the time of the analysis/writing.

**12. How has gender balance been addressed within the authorship?**

Three authors are female (including the lead author, AE), and seven authors are male.

**13. How has the project contributed to training of LMIC researchers?**

While not primarily a capacity building project, this project allowed JFN, EVK, and IN training in working with spatial data. Furthermore, LMIC researchers were actively involved in leading the data collection, storage, and management, and in the interpretation of findings.

**14. How has the project contributed to improvements in local infrastructure?**

The Uganda Malaria Surveillance Programme provides all sentinel sites with a laptop to electronically input outpatient data. These health facilities have benefited greatly from this, as the monthly reports they generate for the Ugandan Ministry of Health are now automated.

**15. What safeguarding procedures were used to protect local study participants and researchers?**

The data collected and subsequently used in the study was de-identified.

Supplemental Figure 1: Number of months each parish contributed to the final dataset

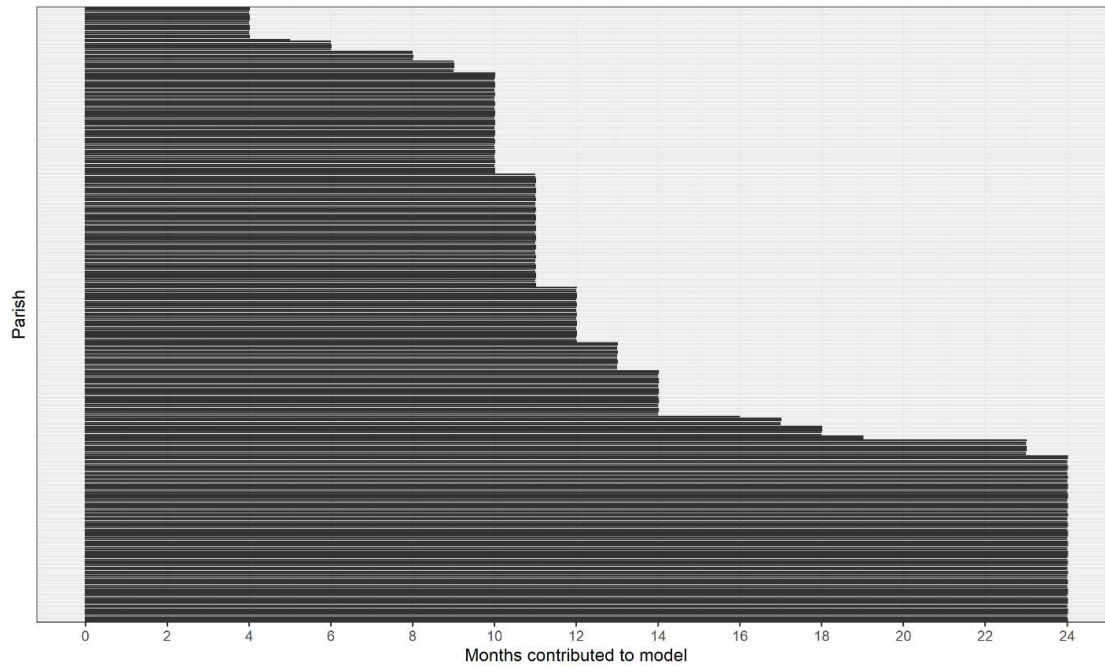

Supplemental Figure 2: Map of 64 high density health facilities

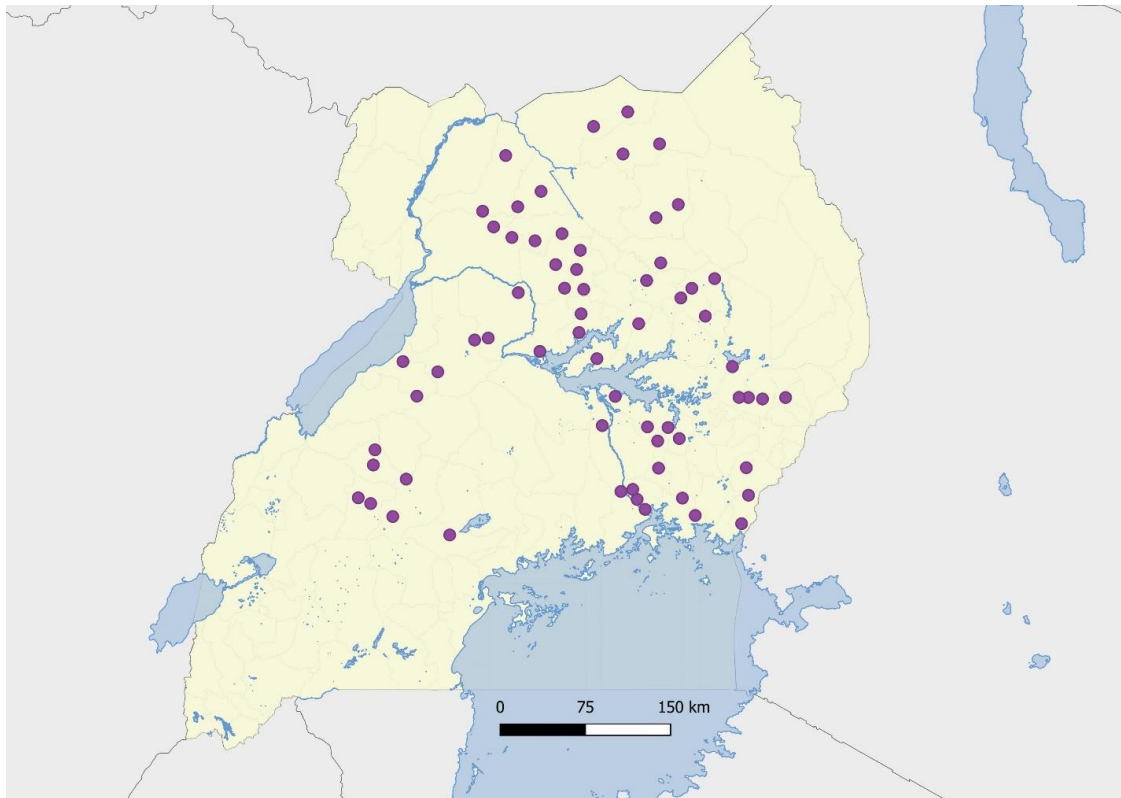

Supplemental Figure 3: Map of spatial blocks of 200km for cross validation and location of Malaria Reference Centers

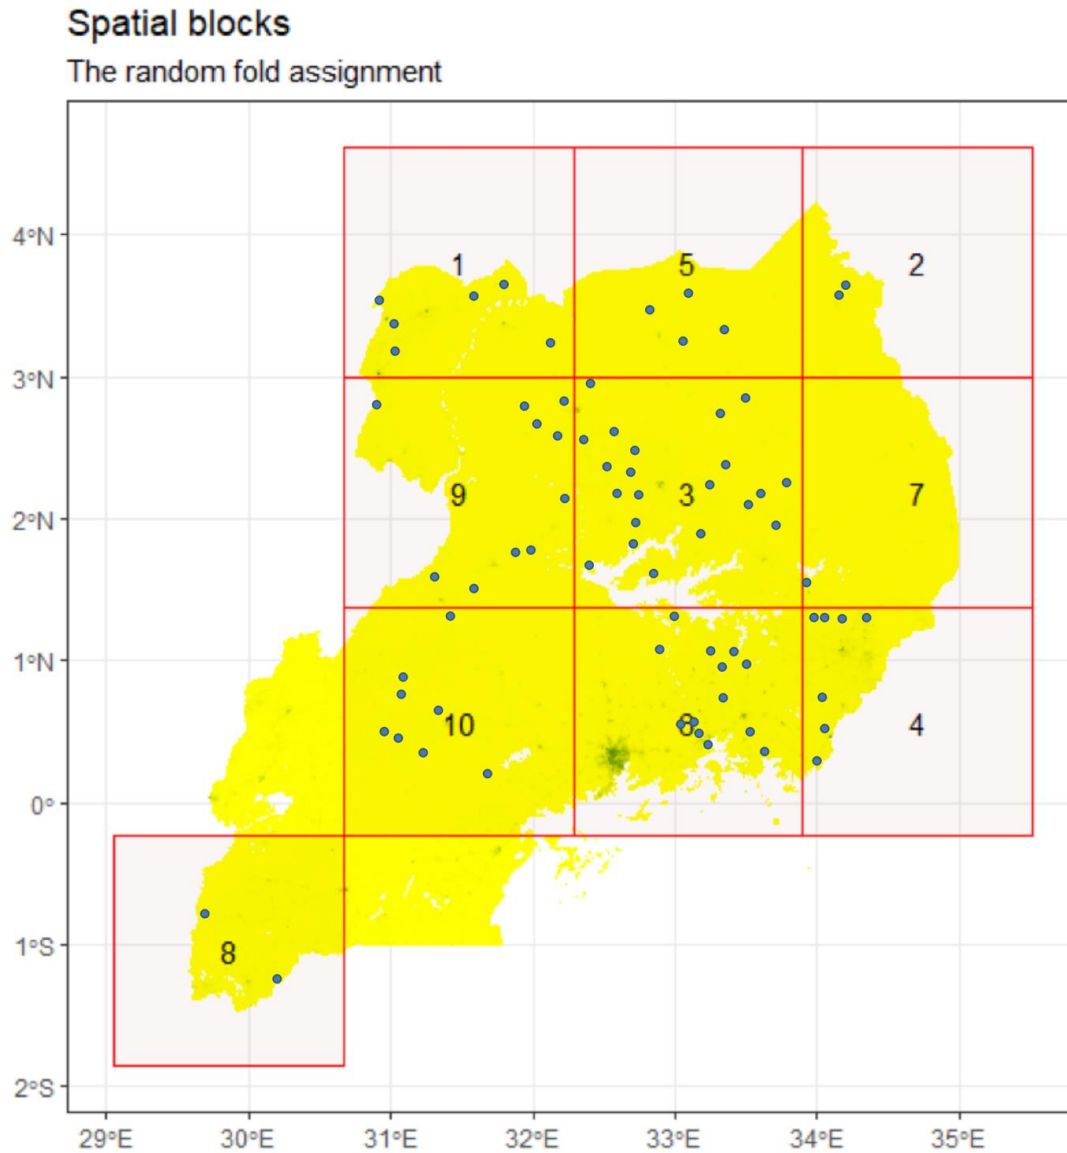

**Supplemental Table 1.** Descriptive information on Malaria Reference Centers included in spatio-temporal model.

| District    | Site          | Number of months of data observed | Number of parishes included in catchment area | Population of catchment area | Number of laboratory confirmed cases of malaria | Malaria incidence (per 1000) |
|-------------|---------------|-----------------------------------|-----------------------------------------------|------------------------------|-------------------------------------------------|------------------------------|
| Agago       | Lira-Kato     | 13                                | 3                                             | 1869                         | 9594                                            | 4738                         |
| Agago       | Patongo       | 24                                | 3                                             | 7092                         | 13476                                           | 950                          |
| Alebtong    | Alebtong      | 23                                | 6                                             | 8777                         | 2001                                            | 119                          |
| Amolatar    | Amolatar      | 24                                | 7                                             | 12630                        | 1892                                            | 75                           |
| Amuria      | Asamuk        | 12                                | 7                                             | 7727                         | 7479                                            | 968                          |
| Amuria      | Morungatuny   | 11                                | 5                                             | 6860                         | 4518                                            | 718                          |
| Amuru       | Amuru         | 14                                | 4                                             | 36831                        | 2456                                            | 57                           |
| Amuru       | Atiak         | 18                                | 6                                             | 17474                        | 15896                                           | 606                          |
| Apac        | Aduku         | 24                                | 5                                             | 16957                        | 14240                                           | 420                          |
| Apac        | Akokoro       | 10                                | 2                                             | 1214                         | 2597                                            | 2567                         |
| Apac        | Teboke        | 11                                | 5                                             | 20695                        | 4837                                            | 255                          |
| Arua        | Cilio         | 13                                | 4                                             | 8390                         | 3172                                            | 349                          |
| Arua        | Opia          | 24                                | 3                                             | 3615                         | 14862                                           | 2056                         |
| Bukedea     | Bukedea       | 4                                 | 4                                             | 1046                         | 469                                             | 1345                         |
| Bukedea     | Kolir         | 14                                | 3                                             | 3530                         | 2798                                            | 679                          |
| Busia       | Busitema      | 10                                | 4                                             | 10820                        | 4650                                            | 516                          |
| Busia       | Lumino        | 24                                | 5                                             | 6058                         | 12003                                           | 991                          |
| Buyende     | Bugaya        | 11                                | 4                                             | 4289                         | 5780                                            | 1470                         |
| Buyende     | Kidera        | 8                                 | 4                                             | 22835                        | 5583                                            | 367                          |
| Dokolo      | Dokolo        | 14                                | 5                                             | 13874                        | 5395                                            | 333                          |
| Gomba       | Maddu         | 11                                | 4                                             | 8184                         | 865                                             | 115                          |
| Gulu        | Awach         | 24                                | 6                                             | 30035                        | 24279                                           | 404                          |
| Gulu        | Pabwo         | 10                                | 2                                             | 5465                         | 4247                                            | 933                          |
| Hoima       | Butema        | 11                                | 7                                             | 16330                        | 947                                             | 63                           |
| Hoima       | Kigorobya     | 24                                | 8                                             | 23707                        | 8857                                            | 187                          |
| Jinja       | Budondo       | 11                                | 3                                             | 4738                         | 1729                                            | 398                          |
| Jinja       | Butagaya      | 12                                | 2                                             | 2887                         | 1658                                            | 574                          |
| Jinja       | Walukuba      | 12                                | 2                                             | 3276                         | 1314                                            | 401                          |
| Kaabong     | Kalapata      | 11                                | 5                                             | 4961                         | 5681                                            | 1249                         |
| Kaabong     | Lokolia       | 19                                | 2                                             | 1027                         | 3887                                            | 2390                         |
| Kaliro      | Bumanya       | 10                                | 5                                             | 16691                        | 2678                                            | 193                          |
| Kaliro      | Nawaikeke     | 10                                | 4                                             | 2393                         | 2728                                            | 1368                         |
| Kanungu     | Kihihi        | 24                                | 8                                             | 8180                         | 5833                                            | 357                          |
| Kapchorwa   | Kaserem       | 12                                | 5                                             | 2250                         | 146                                             | 65                           |
| Kapelebyong | Kapelebyong   | 14                                | 1                                             | 4356                         | 3445                                            | 678                          |
| Kapelebyong | Obalanga      | 12                                | 7                                             | 18863                        | 7990                                            | 424                          |
| Kayunga     | Bbaale        | 24                                | 6                                             | 6191                         | 12602                                           | 1018                         |
| Kayunga     | Kangulumira   | 10                                | 5                                             | 14071                        | 5468                                            | 466                          |
| Kibaale     | Kibaale       | 10                                | 8                                             | 8580                         | 935                                             | 131                          |
| Kibaale     | Kyebando      | 11                                | 5                                             | 7243                         | 3459                                            | 521                          |
| Kiryandongo | Diima         | 10                                | 2                                             | 6268                         | 5473                                            | 1048                         |
| Kiryandongo | Kigumba       | 11                                | 3                                             | 4897                         | 1612                                            | 359                          |
| Kitgum      | Kitgum_Matidi | 14                                | 1                                             | 5125                         | 4611                                            | 771                          |
| Kitgum      | Namokora      | 24                                | 4                                             | 13979                        | 9056                                            | 324                          |
| Koboko      | Ayipe         | 13                                | 2                                             | 3594                         | 4004                                            | 1028                         |
| Koboko      | Lobule        | 24                                | 6                                             | 8731                         | 23164                                           | 1327                         |
| Kole        | Aboke         | 11                                | 2                                             | 5318                         | 4483                                            | 920                          |
| Kole        | Bala          | 6                                 | 5                                             | 13870                        | 3691                                            | 532                          |
| Kumi        | Kamaca        | 10                                | 4                                             | 38648                        | 10679                                           | 332                          |
| Kumi        | Omatenga      | 13                                | 5                                             | 9542                         | 14714                                           | 1423                         |
| Kwania      | Apwori        | 14                                | 3                                             | 7930                         | 9357                                            | 1011                         |
| Kyegegwa    | Kakabara      | 12                                | 5                                             | 21029                        | 2448                                            | 116                          |

**Supplemental Table 1.** Descriptive information on Malaria Reference Centers included in spatio-temporal model.

| District | Site      | Number of months of data observed | Number of parishes included in catchment area | Population of catchment area | Number of laboratory confirmed cases of malaria | Malaria incidence (per 1000) |
|----------|-----------|-----------------------------------|-----------------------------------------------|------------------------------|-------------------------------------------------|------------------------------|
| Kyegegwa | Kyegegwa  | 11                                | 4                                             | 16948                        | 1215                                            | 78                           |
| Lamwo    | Madi Opei | 10                                | 4                                             | 11089                        | 7077                                            | 766                          |
| Lamwo    | Padibe    | 24                                | 5                                             | 6278                         | 13895                                           | 1107                         |
| Luuka    | Ikumbya   | 12                                | 4                                             | 5453                         | 6690                                            | 1227                         |
| Luuka    | Kiyunga   | 10                                | 3                                             | 15049                        | 4667                                            | 372                          |
| Masindi  | Bwijanga  | 10                                | 3                                             | 10430                        | 884                                             | 102                          |
| Masindi  | Kyatiri   | 10                                | 1                                             | 1537                         | 234                                             | 183                          |
| Mayuge   | Buwaiswa  | 12                                | 5                                             | 11905                        | 5261                                            | 442                          |
| Mayuge   | Kigandolo | 11                                | 6                                             | 21561                        | 4013                                            | 203                          |
| Moyo     | Lefori    | 4                                 | 2                                             | 3381                         | 1386                                            | 1230                         |
| Moyo     | Metu      | 4                                 | 4                                             | 6281                         | 1706                                            | 815                          |
| Mubende  | Kasambya  | 24                                | 1                                             | 1113                         | 945                                             | 425                          |
| Mubende  | Kiyuni    | 11                                | 2                                             | 5045                         | 1481                                            | 320                          |
| Nwoya    | Alero     | 9                                 | 3                                             | 9135                         | 4207                                            | 614                          |
| Nwoya    | Koch Goma | 17                                | 4                                             | 16481                        | 19822                                           | 849                          |
| Omoro    | Bobi      | 11                                | 3                                             | 3832                         | 7228                                            | 2058                         |
| Omoro    | Lalogi    | 24                                | 5                                             | 15326                        | 19431                                           | 634                          |
| Otuke    | Orum      | 24                                | 2                                             | 210                          | 309                                             | 736                          |
| Oyam     | Anyeke    | 24                                | 4                                             | 14943                        | 11046                                           | 370                          |
| Oyam     | Otwal     | 14                                | 6                                             | 3989                         | 7523                                            | 1617                         |
| Rukiga   | Kamwezi   | 11                                | 6                                             | 11892                        | 48                                              | 4                            |
| Tororo   | Nagongera | 24                                | 7                                             | 13906                        | 842                                             | 30                           |



Supplemental Figure 4: Smoothed relationships between covariates and outcome.

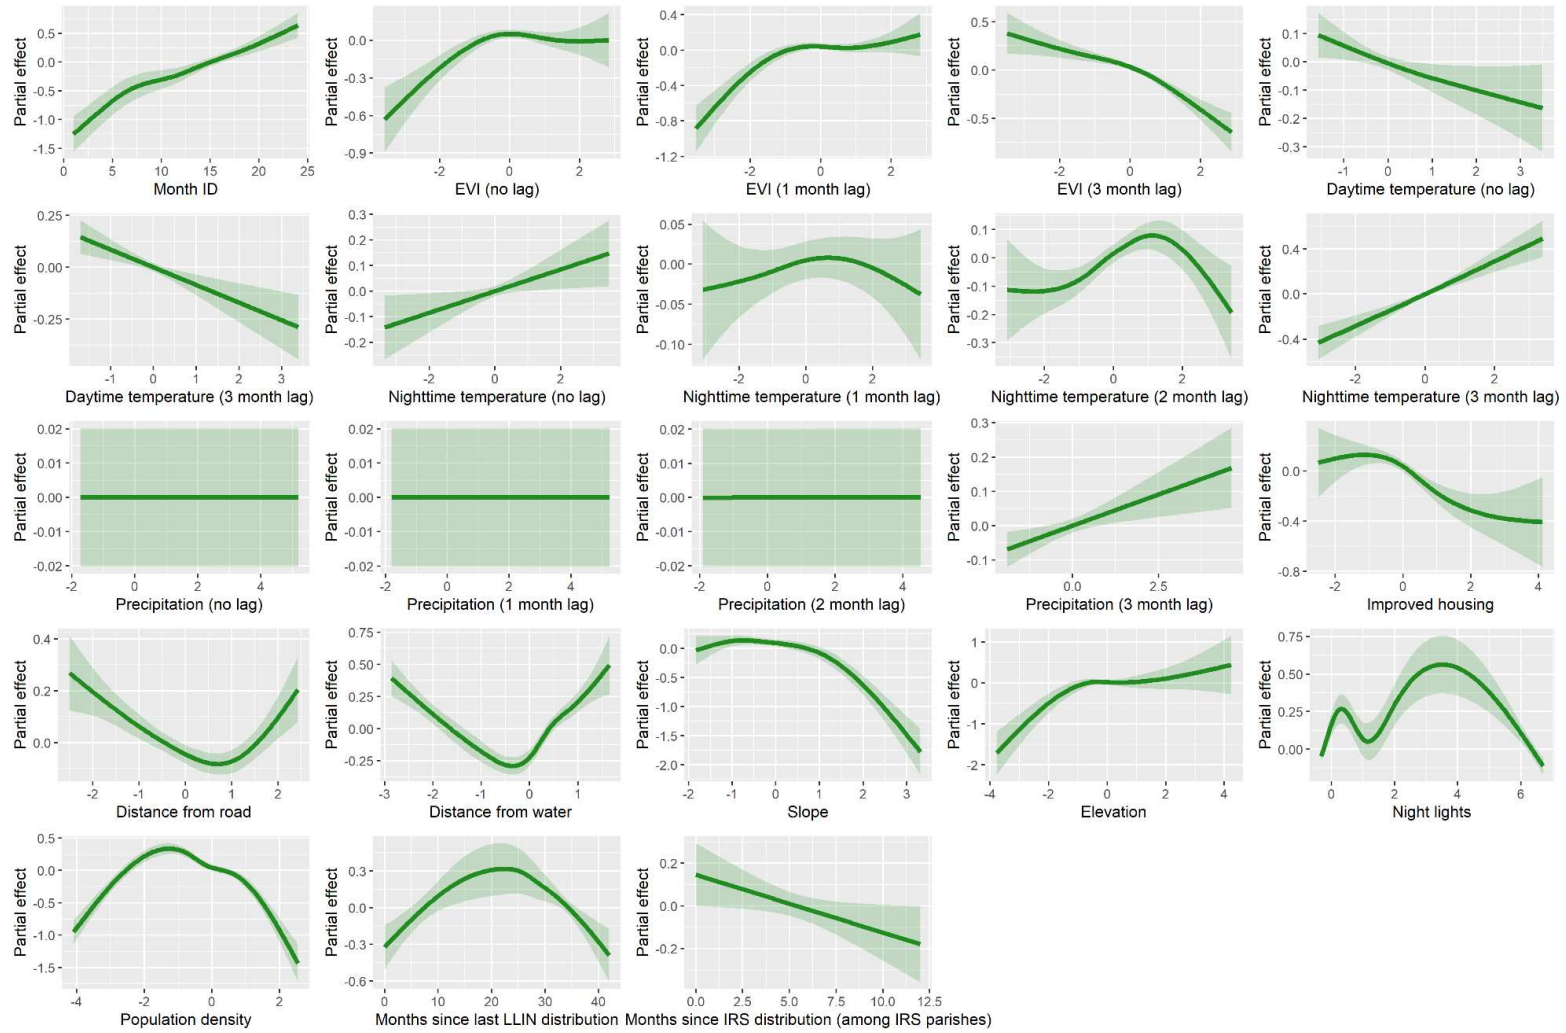

Supplemental Figure 5: Model diagnostics from generalized additive model

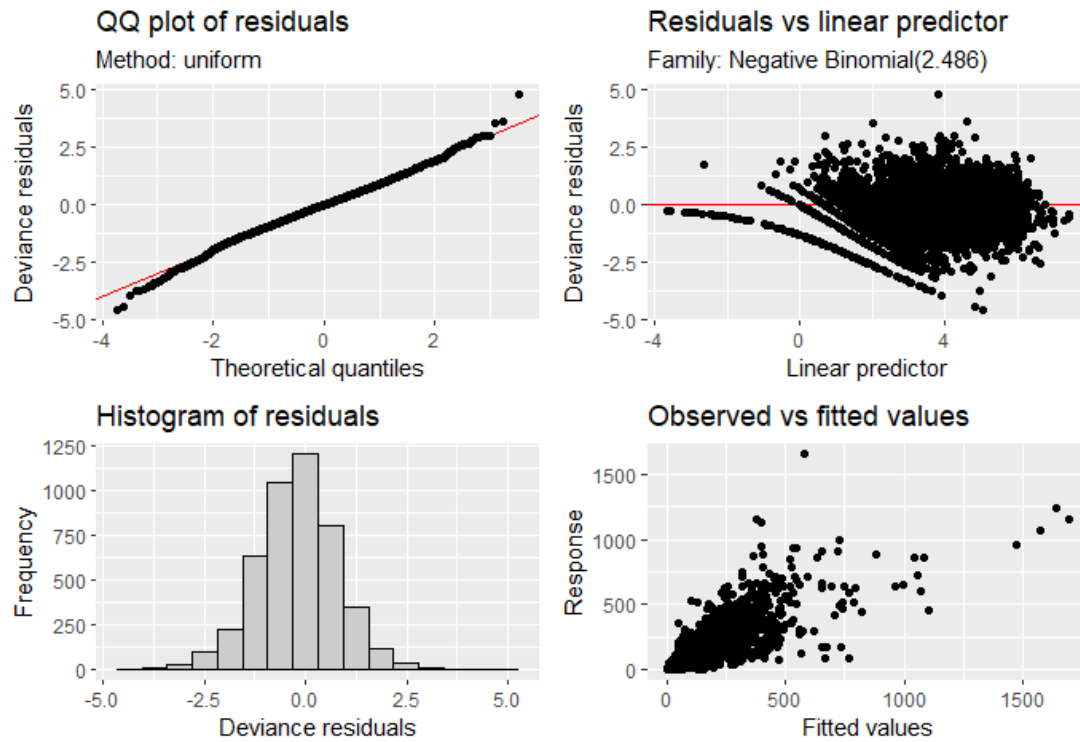

Supplement: inline-supplementary-material-1 [file inline-supplementary-material-1.pdf]
